# Supplementary material
Source: PubMed Central journal article supplement (PMC8016751)

Figure 1

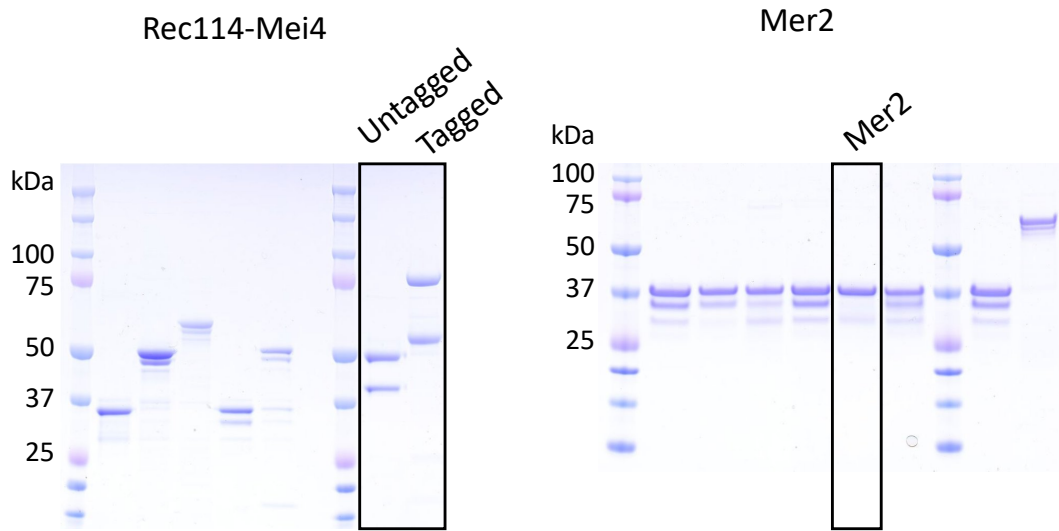

Figure 2a

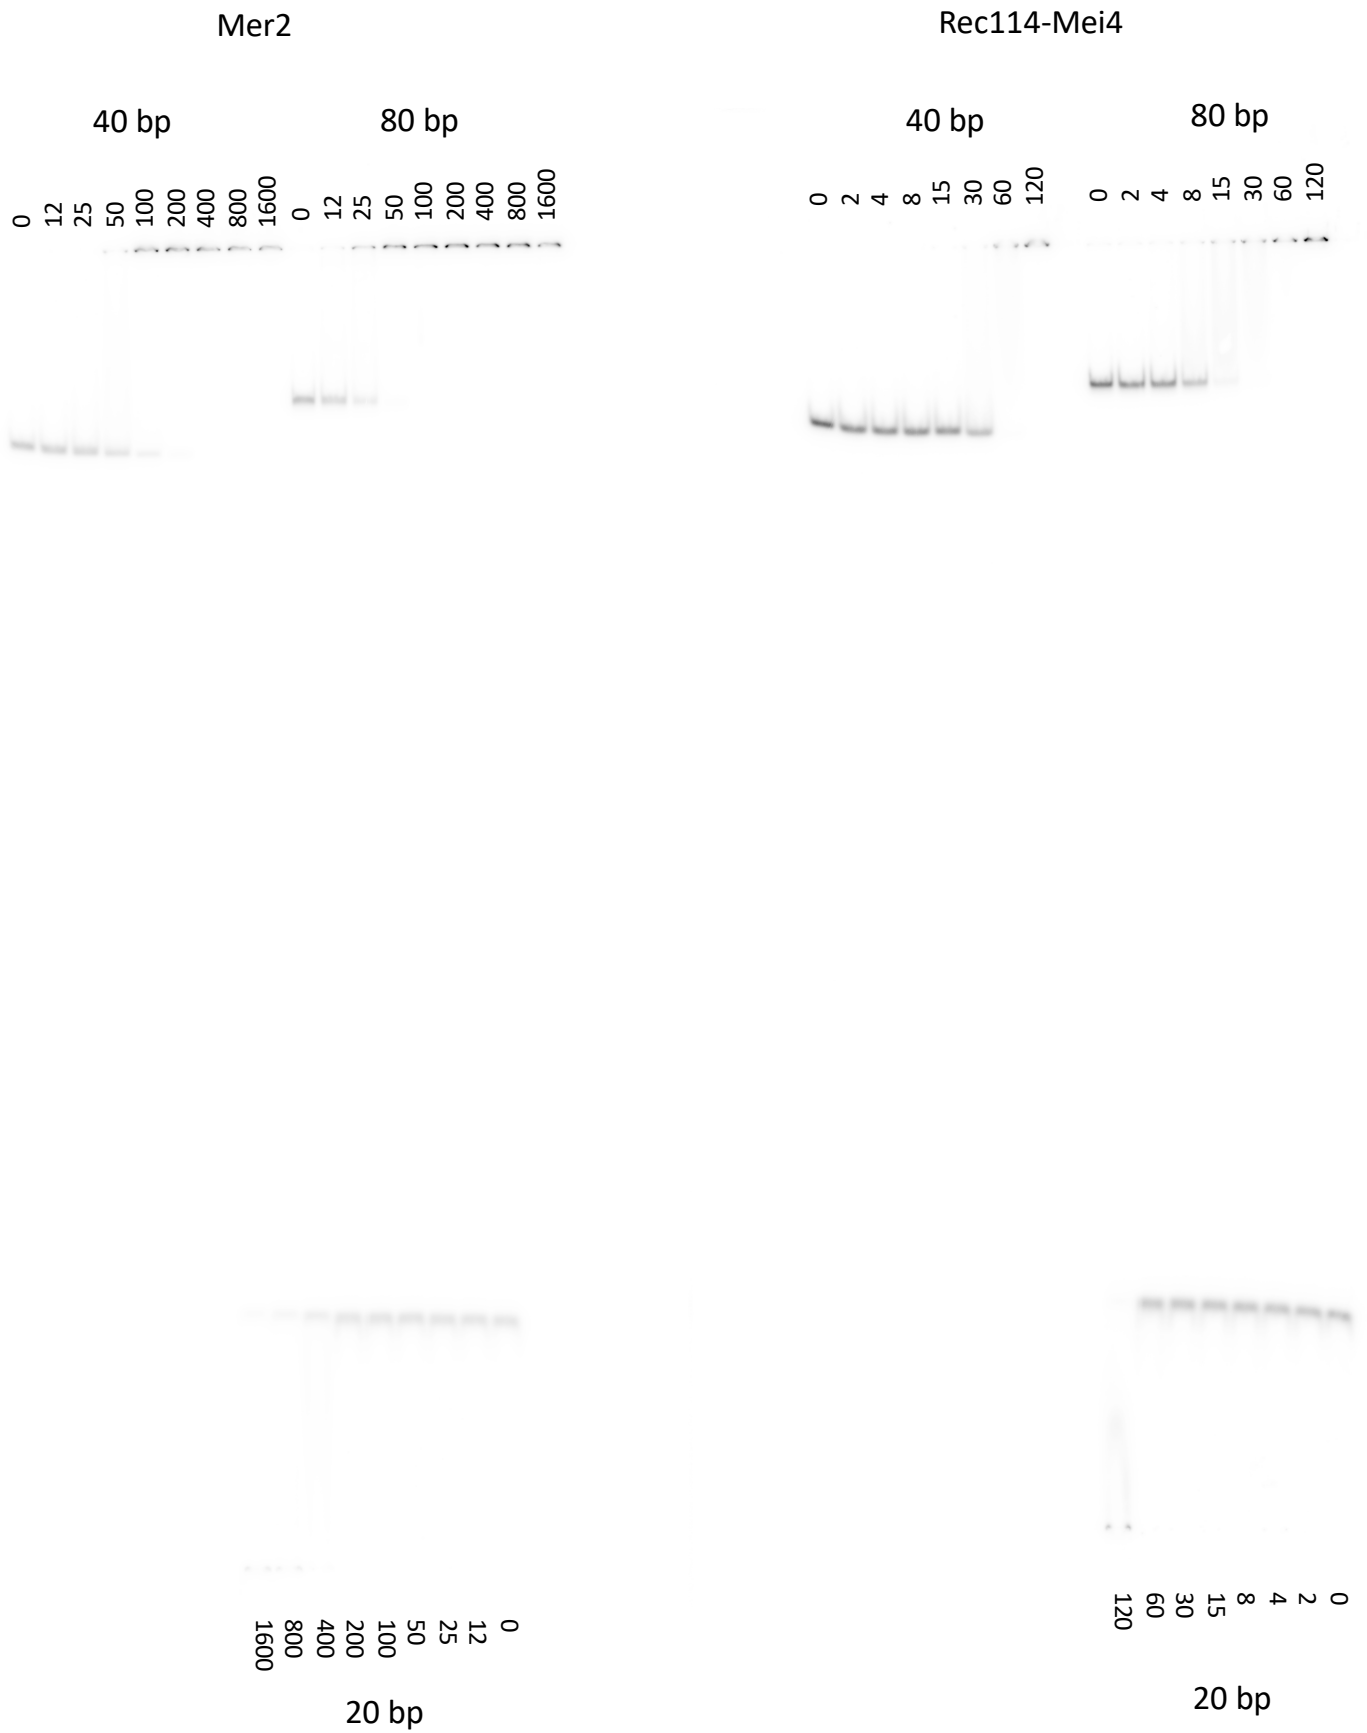

Figure 3a

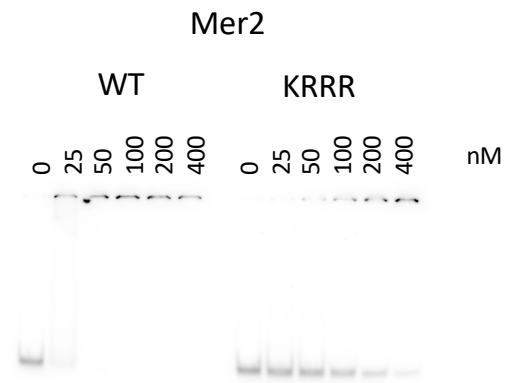

Figure 3d

Original Figure

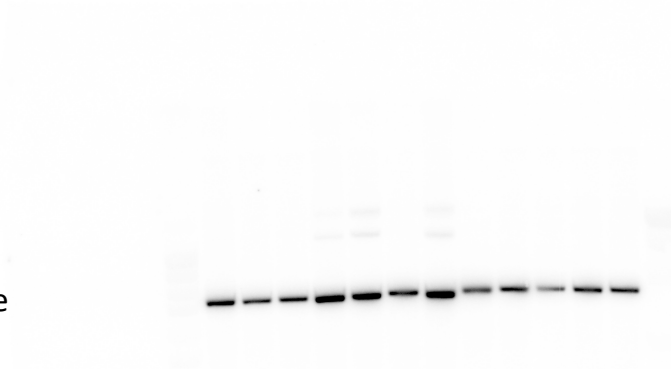

Contrast adjusted

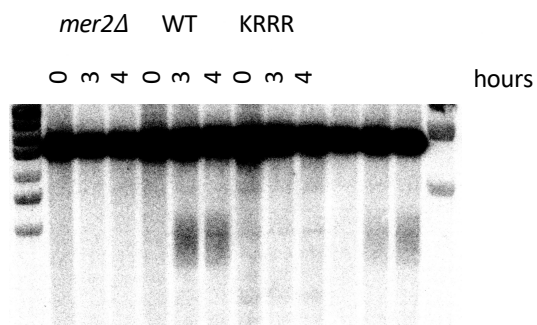



ED Figure 6

Mer2

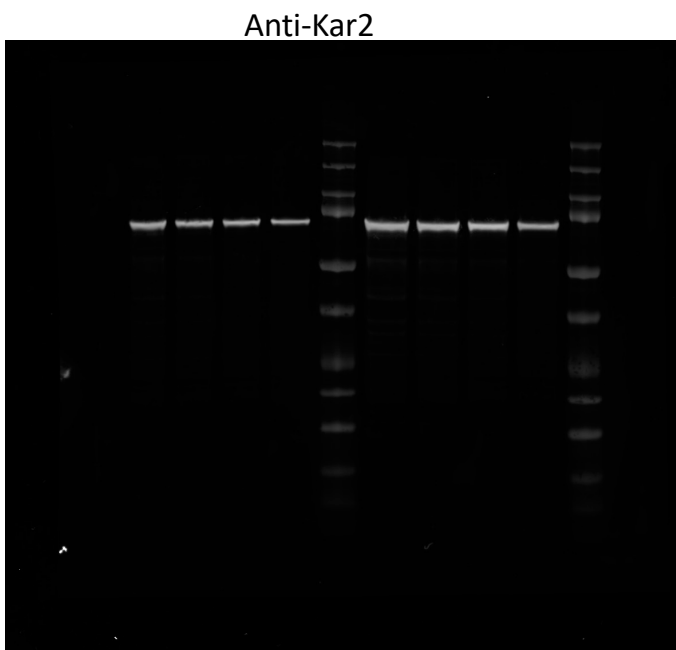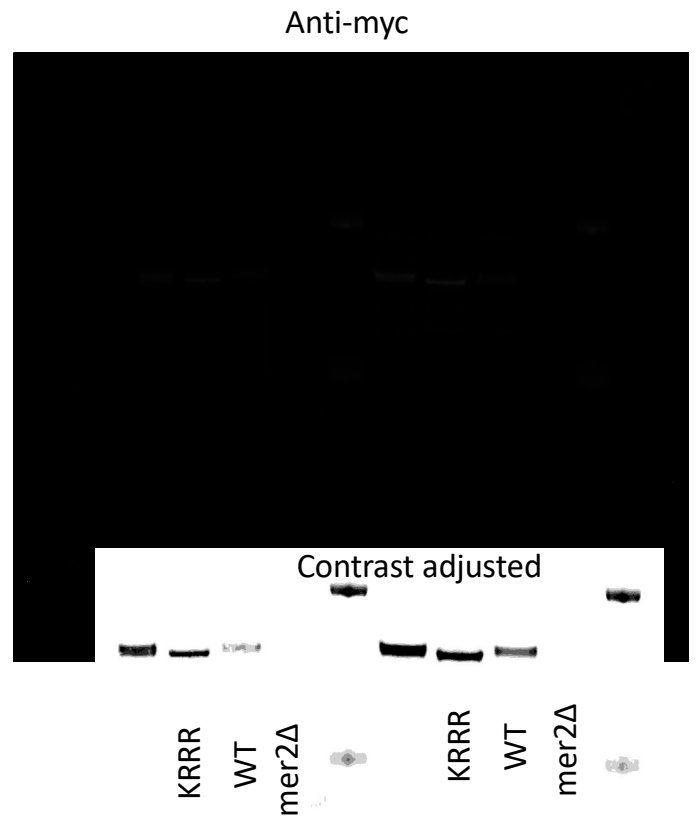

ED Figure 6

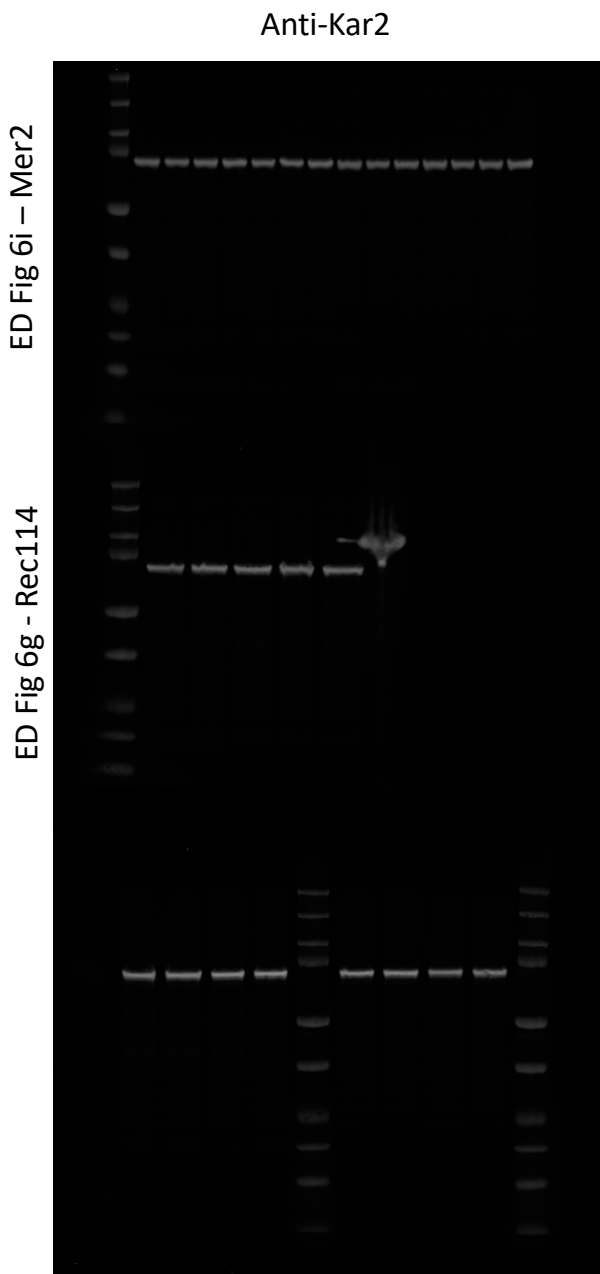

ED Fig 6i - Contrast adjusted

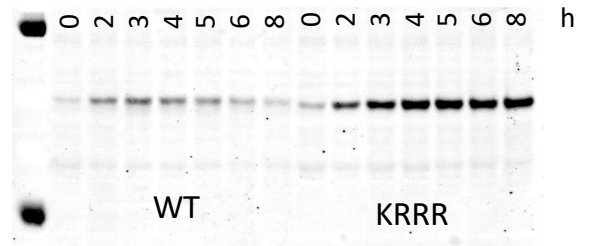

Anti-myc

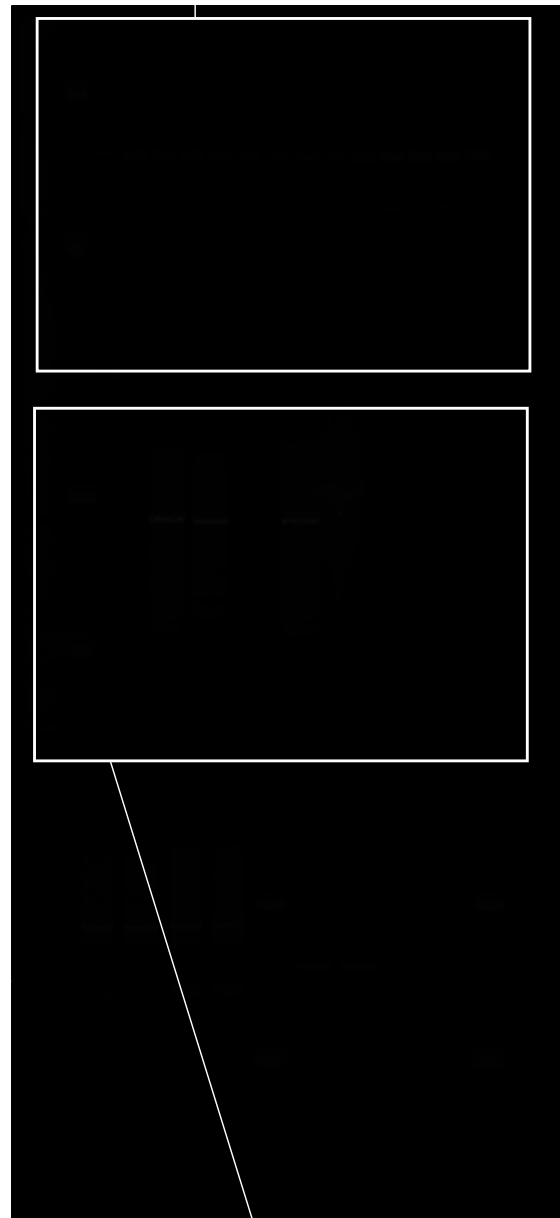

ED Fig 6g - Rec114  
Contrast adjusted

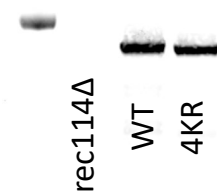

ED Figure 8

Anti-Kar2

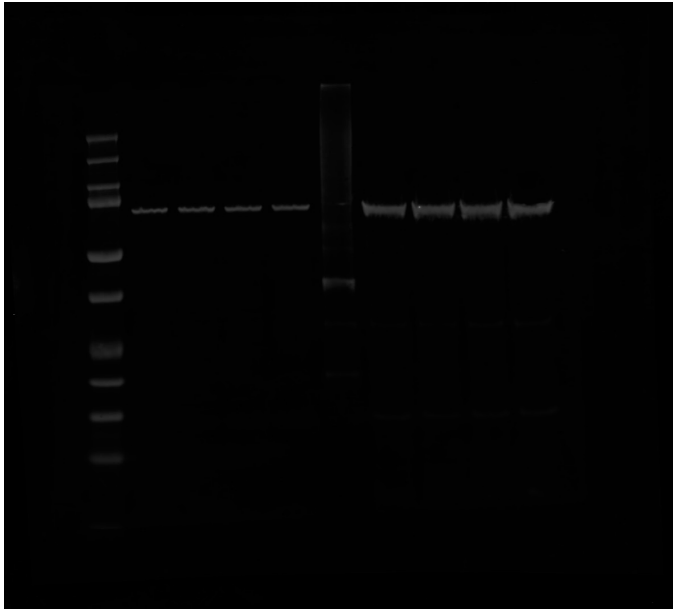

Anti-myc

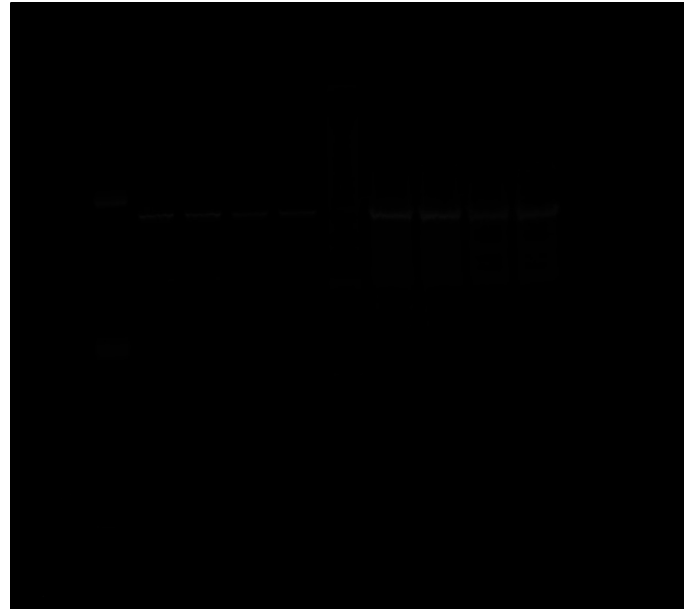

Contrast adjusted

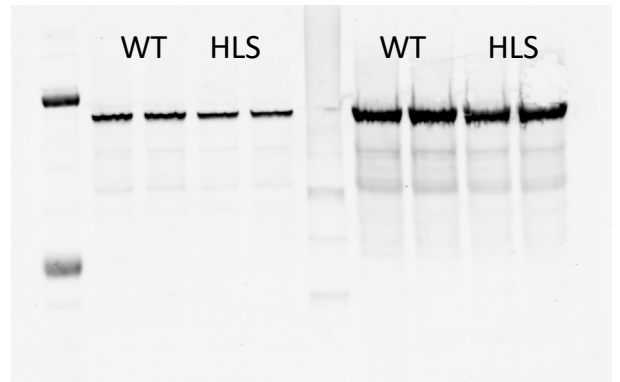

Supplement: NIHMS1675459-supplement-Source_data.pdf [file NIHMS1675459-supplement-Source_data.pdf]
